# Supplementary material for: Panacea: a hyperpromiscuous antitoxin protein domain for the neutralisation of diverse toxin domains
Source: bioRxiv or medRxiv preprint supplement (doi:10.1101/2021.05.07.442387), 2021-05-07

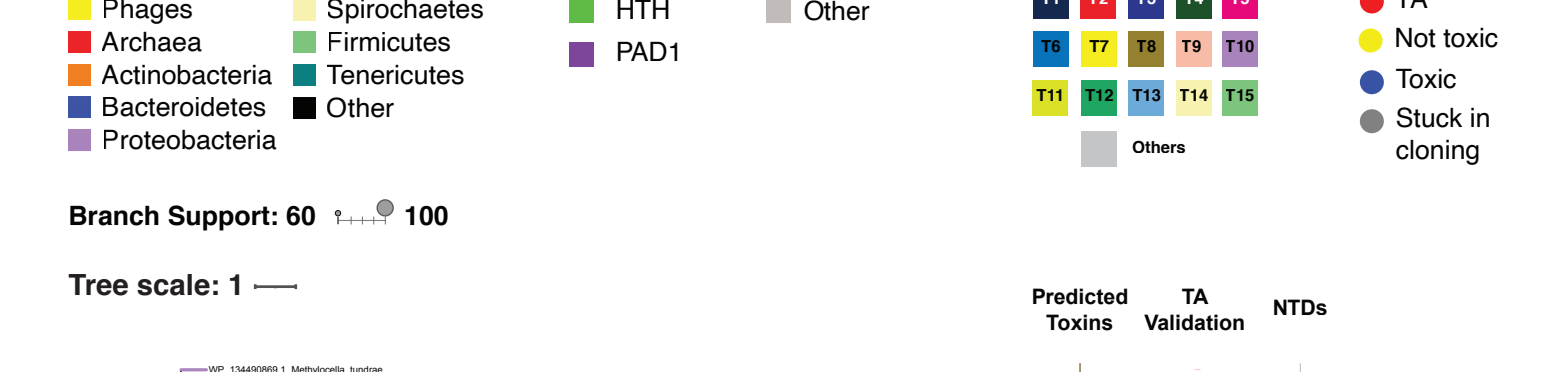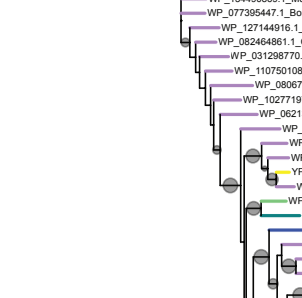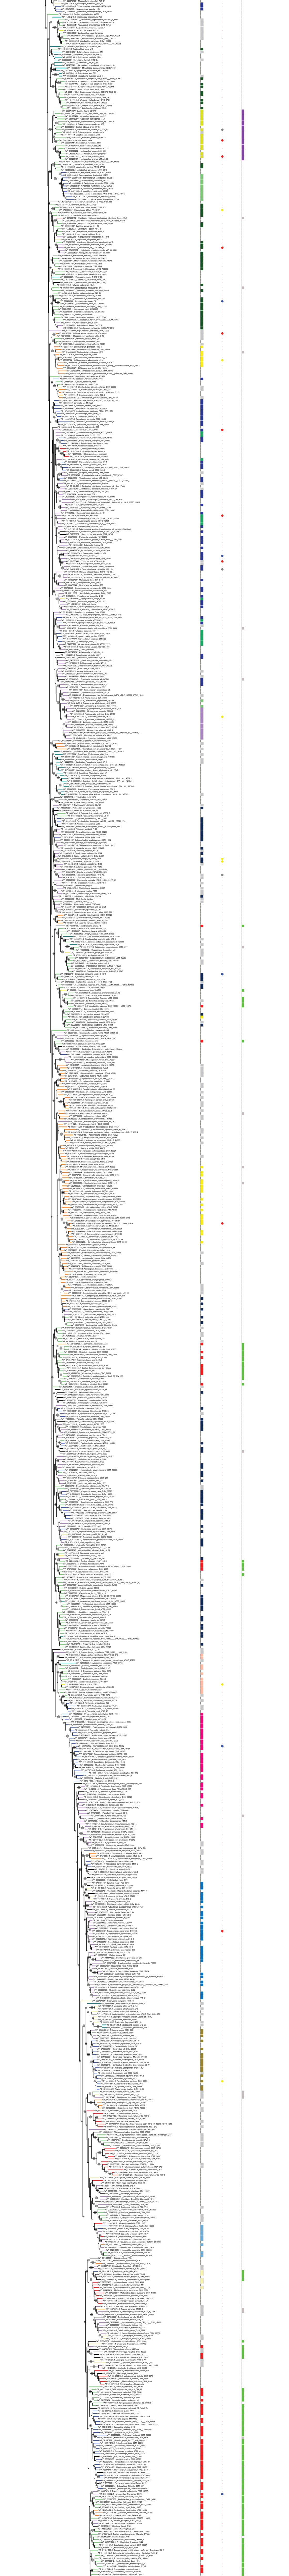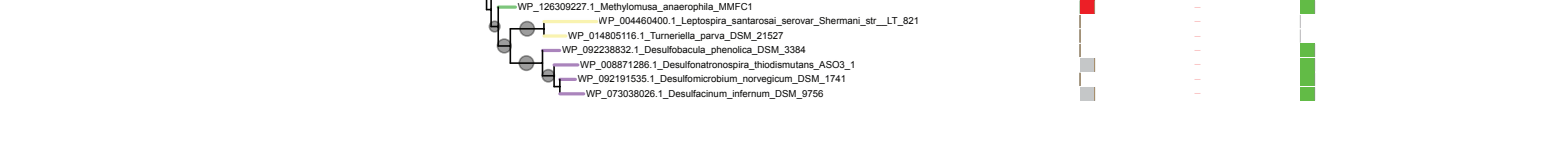

Supplement: Supplementary file [file media-1.pdf]
